# Supplementary material for: Decrease of α-defensin impairs intestinal metabolite homeostasis via dysbiosis in mouse chronic social defeat stress model
Source: Springer Nature journal article supplement (doi:10.1038/s41598-021-89308-y), 2021-05-10
Supplement: 41598_2021_89308_MOESM1_ESM.pdf [file 41598_2021_89308_MOESM1_ESM.pdf]

## Supplementary Information

### **Decrease of $\alpha$ -defensin impairs intestinal metabolite homeostasis via dysbiosis in mouse chronic social defeat stress model**

Kosuke Suzuki<sup>1</sup>, Kiminori Nakamura<sup>1,2</sup>, Yu Shimizu<sup>2</sup>, Yuki Yokoi<sup>2</sup>, Shuya Ohira<sup>1</sup>, Mizu Hagiwara<sup>1</sup>,

Yi Wang<sup>3</sup>, Yuchi Song<sup>3</sup>, Tomoyasu Aizawa<sup>3,4</sup>, Tokiyoshi Ayabe<sup>1,2,\*</sup>

<sup>1</sup> Innate Immunity Laboratory, Graduate School of Life Science, Hokkaido University, Sapporo, Japan. <sup>2</sup> Department of Cell Biological Science, Faculty of Advanced Life Science, Hokkaido

University, Sapporo Japan. <sup>3</sup> Laboratory of Protein Science, Department of Advanced

Transdisciplinary Science, Faculty of Advanced Life Science, Hokkaido University, Sapporo, Japan.

<sup>4</sup> Global Station for Soft Matter, Global Institution for Collaborative Research and Education,

Hokkaido University, Sapporo, Japan.

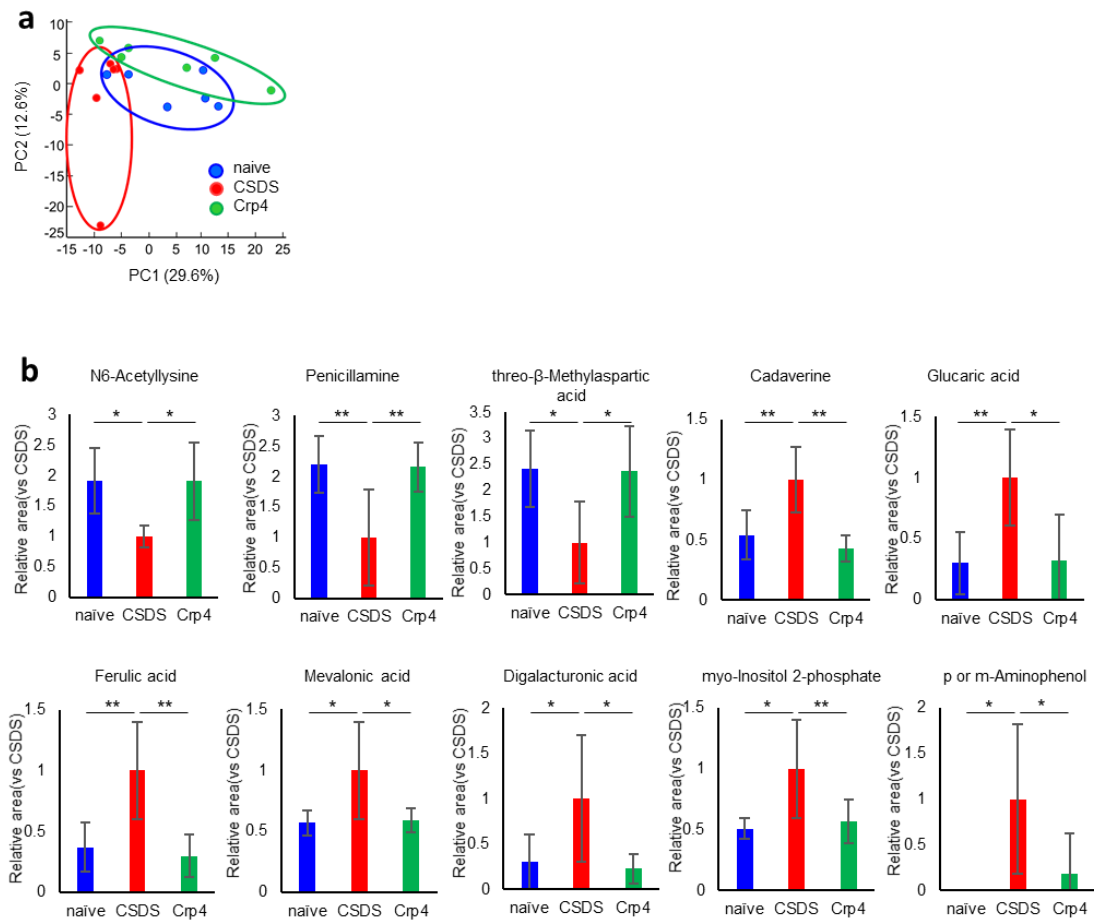

**Supplementary Figure 1 Changes in fecal metabolites induced by  $\alpha$ -defensin administration.**

(a) principal component analysis of gut metabolites. (b) relative ratio of intestinal metabolites to CSDS group which are significantly different between naive group and CSDS group, and between CSDS group and Crp4 group respectively. Data are shown as the mean  $\pm$  SE. Tukey's tests were used to compare the data. \*,  $P < 0.05$ ; \*\*,  $P < 0.01$ .

**Supplementary Table 1 Fecal Crp1 concentration**

|       | Day 1   |       | Day 9   |       | Day 14  |       |
|-------|---------|-------|---------|-------|---------|-------|
|       | Average | SD    | Average | SD    | Average | SD    |
| Naïve | 440.1   | 246.3 | 587.6   | 267.1 | 455.5   | 248.2 |
| CSDS  | 231.2   | 216.8 | 146.9   | 15.6  | 198.1   | 90.0  |

(ng/g feces)



| Phylum          | Class                | Order              | Family               | Genus           | naive  |       |       |       | CSDS   |       |       |      | Crp4   |      |       |      |
|-----------------|----------------------|--------------------|----------------------|-----------------|--------|-------|-------|-------|--------|-------|-------|------|--------|------|-------|------|
|                 |                      |                    |                      |                 | before |       | after |       | before |       | after |      | before |      | after |      |
|                 |                      |                    |                      |                 | Mean.  | SD    | Mean. | SD    | Mean.  | SD    | Mean. | SD   | Mean.  | SD   | Mean. | SD   |
| Actinobacteria  | Actinobacteria       | Actinomycetales    | Microbacteriaceae    |                 | 0.00   | 0.01  | 0.00  | 0.00  | 0.00   | 0.00  | 0.00  | 0.00 | 0.00   | 0.00 | 0.00  | 0.00 |
| Actinobacteria  | Actinobacteria       | Actinomycetales    | Nocardiaceae         |                 | 0.00   | 0.00  | 0.00  | 0.00  | 0.00   | 0.00  | 0.00  | 0.00 | 0.00   | 0.00 | 0.00  | 0.00 |
| Actinobacteria  | Actinobacteria       | Bifidobacteriales  | Bifidobacteriaceae   |                 | 0.00   | 0.00  | 0.18  | 0.43  | 0.00   | 0.00  | 0.47  | 1.08 | 0.00   | 0.00 | 0.00  | 0.00 |
| Actinobacteria  | Coriobacteriia       | Coriobacteriales   | Coriobacteriaceae    |                 | 0.78   | 0.36  | 1.18  | 0.35  | 0.82   | 0.33  | 1.29  | 0.35 | 0.70   | 0.20 | 1.77  | 0.70 |
|                 | Aquificae            | Aquificales        | Aquificaceae         |                 | 0.00   | 0.00  | 0.00  | 0.00  | 0.00   | 0.00  | 0.00  | 0.00 | 0.00   | 0.00 | 0.00  | 0.00 |
| Bacteroidetes   | Bacteroidia          | Bacteroidales      | Bacteroidaceae       |                 | 1.91   | 0.56  | 0.39  | 0.44  | 1.31   | 0.70  | 0.48  | 0.22 | 2.05   | 0.61 | 0.67  | 0.36 |
| Bacteroidetes   | Bacteroidia          | Bacteroidales      | Porphyromonadaceae   |                 | 0.92   | 0.26  | 0.63  | 0.25  | 0.74   | 0.39  | 0.71  | 0.40 | 1.16   | 0.53 | 0.64  | 0.16 |
| Bacteroidetes   | Bacteroidia          | Bacteroidales      | Rikenellaceae        |                 | 0.00   | 0.00  | 0.19  | 0.45  | 0.00   | 0.00  | 0.00  | 0.00 | 0.00   | 0.00 | 0.00  | 0.00 |
| Bacteroidetes   | Bacteroidia          | Bacteroidales      | S24-7                |                 | 34.33  | 14.62 | 34.30 | 10.79 | 30.38  | 13.18 | 46.34 | 4.92 | 41.84  | 6.34 | 43.01 | 6.77 |
| Bacteroidetes   | Bacteroidia          | Bacteroidales      | [Paraprevotellaceae] |                 | 0.00   | 0.00  | 1.07  | 1.22  | 0.00   | 0.00  | 0.66  | 1.23 | 0.00   | 0.00 | 0.00  | 0.00 |
| Cyanobacteria   | Chloroplast          | Streptophyta       | unknown              |                 | 0.00   | 0.00  | 0.00  | 0.00  | 0.00   | 0.00  | 0.00  | 0.00 | 0.00   | 0.00 | 0.00  | 0.00 |
| Deferribacteres | Deferribacteres      | Deferribacterales  | Deferribacteraceae   |                 | 0.25   | 0.15  | 0.05  | 0.03  | 0.48   | 0.51  | 0.04  | 0.03 | 0.19   | 0.13 | 0.03  | 0.02 |
| Firmicutes      | unknown              | unknown            | unknown              |                 | 0.00   | 0.00  | 0.00  | 0.00  | 0.00   | 0.00  | 0.00  | 0.00 | 0.00   | 0.00 | 0.00  | 0.00 |
| Firmicutes      | Bacilli              | unknown            | unknown              |                 | 0.00   | 0.00  | 0.00  | 0.00  | 0.00   | 0.00  | 0.00  | 0.00 | 0.00   | 0.00 | 0.00  | 0.00 |
| Firmicutes      | Bacilli              | Bacillales         | Planococcaceae       |                 | 0.00   | 0.00  | 0.00  | 0.00  | 0.00   | 0.00  | 0.00  | 0.00 | 0.00   | 0.00 | 0.00  | 0.00 |
| Firmicutes      | Bacilli              | Bacillales         | Staphylococcaceae    |                 | 0.00   | 0.00  | 0.00  | 0.00  | 0.00   | 0.00  | 0.00  | 0.00 | 0.00   | 0.00 | 0.00  | 0.00 |
| Firmicutes      | Bacilli              | Lactobacillales    | Enterococcaceae      |                 | 0.00   | 0.00  | 0.00  | 0.00  | 0.00   | 0.00  | 0.00  | 0.00 | 0.01   | 0.00 | 0.00  | 0.00 |
| Firmicutes      | Bacilli              | Lactobacillales    | Lactobacillaceae     |                 | 14.42  | 9.57  | 3.03  | 3.60  | 21.37  | 14.13 | 7.37  | 5.78 | 10.52  | 6.34 | 3.72  | 2.01 |
| Firmicutes      | Bacilli              | Lactobacillales    | Leuconostocaceae     |                 | 0.00   | 0.00  | 0.00  | 0.00  | 0.00   | 0.00  | 0.00  | 0.00 | 0.00   | 0.00 | 0.00  | 0.00 |
| Firmicutes      | Bacilli              | Lactobacillales    | Streptococcaceae     |                 | 0.00   | 0.00  | 0.01  | 0.01  | 0.00   | 0.00  | 0.01  | 0.01 | 0.00   | 0.00 | 0.01  | 0.02 |
| Firmicutes      | Bacilli              | Turicibacterales   | Turicibacteraceae    |                 | 0.00   | 0.00  | 0.00  | 0.00  | 0.24   | 0.42  | 0.00  | 0.00 | 0.11   | 0.24 | 0.43  | 1.06 |
| Firmicutes      | Clostridia           | unknown            | unknown              |                 | 0.00   | 0.00  | 0.00  | 0.00  | 0.00   | 0.00  | 0.00  | 0.01 | 0.00   | 0.00 | 0.00  | 0.00 |
| Firmicutes      | Clostridia           | Clostridiales      | unknown              |                 | 7.23   | 5.44  | 12.62 | 5.23  | 6.18   | 2.83  | 6.20  | 2.42 | 6.02   | 2.46 | 5.07  | 1.74 |
| Firmicutes      | Clostridia           | Clostridiales      | unknown              |                 | 4.45   | 0.98  | 4.97  | 1.54  | 5.43   | 3.26  | 3.92  | 1.00 | 4.08   | 1.88 | 4.46  | 0.90 |
| Firmicutes      | Clostridia           | Clostridiales      | Christensenellaceae  |                 | 0.02   | 0.01  | 0.03  | 0.02  | 0.01   | 0.01  | 0.03  | 0.01 | 0.01   | 0.01 | 0.02  | 0.01 |
| Firmicutes      | Clostridia           | Clostridiales      | Clostridiaceae       |                 | 1.20   | 0.75  | 0.12  | 0.11  | 1.62   | 0.63  | 0.25  | 0.11 | 1.76   | 0.59 | 0.32  | 0.25 |
| Firmicutes      | Clostridia           | Clostridiales      | Dehalobacteriaceae   |                 | 0.18   | 0.09  | 0.41  | 0.22  | 0.15   | 0.14  | 0.17  | 0.13 | 0.20   | 0.07 | 0.23  | 0.16 |
| Firmicutes      | Clostridia           | Clostridiales      | Eubacteriaceae       |                 | 0.01   | 0.01  | 0.01  | 0.01  | 0.00   | 0.00  | 0.00  | 0.01 | 0.01   | 0.01 | 0.00  | 0.00 |
| Firmicutes      | Clostridia           | Clostridiales      | Lachnospiraceae      |                 | 20.52  | 10.62 | 21.68 | 6.49  | 18.56  | 8.27  | 13.29 | 5.84 | 16.29  | 5.98 | 15.96 | 7.52 |
| Firmicutes      | Clostridia           | Clostridiales      | Peptococcaceae       |                 | 0.87   | 0.55  | 0.89  | 0.56  | 1.16   | 0.53  | 1.52  | 0.38 | 0.91   | 0.46 | 1.92  | 0.67 |
| Firmicutes      | Clostridia           | Clostridiales      | Ruminococcaceae      |                 | 9.07   | 4.31  | 9.89  | 3.00  | 7.53   | 3.42  | 6.16  | 2.08 | 7.80   | 1.74 | 7.48  | 1.73 |
| Firmicutes      | Clostridia           | Clostridiales      | [Mogibacteriaceae]   |                 | 0.13   | 0.04  | 0.19  | 0.04  | 0.13   | 0.09  | 0.12  | 0.02 | 0.12   | 0.05 | 0.17  | 0.06 |
| Firmicutes      | Erysipelotrichi      | Erysipelotrichales | Erysipelotrichaceae  |                 | 2.78   | 3.46  | 5.88  | 3.16  | 2.52   | 2.20  | 8.54  | 4.42 | 4.60   | 2.69 | 11.20 | 6.60 |
| Proteobacteria  | Alphaproteobacteria  | Rhizobiales        | Methylobacteriaceae  |                 | 0.00   | 0.00  | 0.00  | 0.00  | 0.00   | 0.00  | 0.00  | 0.00 | 0.00   | 0.00 | 0.00  | 0.00 |
| Proteobacteria  | Alphaproteobacteria  | Rickettsiales      | mitochondria         |                 | 0.00   | 0.00  | 0.00  | 0.00  | 0.00   | 0.00  | 0.00  | 0.00 | 0.00   | 0.00 | 0.00  | 0.00 |
| Proteobacteria  | Betaproteobacteria   | Burkholderiales    | Alcaligenaceae       |                 | 0.24   | 0.16  | 0.58  | 0.24  | 0.28   | 0.25  | 0.81  | 0.27 | 0.53   | 0.29 | 0.95  | 0.33 |
| Proteobacteria  | Betaproteobacteria   | Burkholderiales    | Oxalobacteraceae     |                 | 0.00   | 0.00  | 0.00  | 0.00  | 0.00   | 0.00  | 0.00  | 0.00 | 0.00   | 0.00 | 0.00  | 0.00 |
| Proteobacteria  | Deltaproteobacteria  | Desulfobrivionales | Desulfobrivionaceae  |                 | 0.00   | 0.00  | 0.43  | 1.05  | 0.00   | 0.00  | 0.00  | 0.00 | 0.00   | 0.00 | 0.00  | 0.00 |
| Proteobacteria  | Gammaaproteobacteria | Enterobacteriales  | Enterobacteriaceae   |                 | 0.00   | 0.01  | 0.00  | 0.00  | 0.01   | 0.01  | 0.00  | 0.00 | 0.02   | 0.04 | 0.00  | 0.01 |
| Proteobacteria  | Gammaaproteobacteria | Pseudomonadales    | Moraxellaceae        |                 | 0.00   | 0.00  | 0.00  | 0.00  | 0.00   | 0.00  | 0.00  | 0.00 | 0.00   | 0.00 | 0.00  | 0.00 |
| TM7             | TM7-3                | CW040              | F16                  |                 | 0.00   | 0.00  | 0.01  | 0.02  | 0.00   | 0.00  | 0.00  | 0.00 | 0.00   | 0.00 | 0.00  | 0.00 |
| Tenericutes     | Mollicutes           | Anaeroplasmatales  | Anaeroplasmataceae   |                 | 0.01   | 0.01  | 0.02  | 0.03  | 0.06   | 0.13  | 0.03  | 0.05 | 0.01   | 0.01 | 0.02  | 0.03 |
| Tenericutes     | Mollicutes           | RF39               | unknown              |                 | 0.26   | 0.11  | 0.08  | 0.03  | 0.26   | 0.21  | 0.13  | 0.06 | 0.19   | 0.10 | 0.13  | 0.05 |
| Verrucomicrobia | Verrucomicrobiae     | Verrucomicrobiales | Verrucomicrobiaceae  |                 | 0.39   | 0.54  | 1.18  | 2.60  | 0.72   | 1.06  | 1.44  | 1.16 | 0.81   | 0.87 | 1.74  | 2.04 |
| unknown         | unknown              | unknown            | unknown              | unknown         | 0.02   | 0.02  | 0.01  | 0.01  | 0.03   | 0.02  | 0.01  | 0.01 | 0.06   | 0.08 | 0.02  | 0.02 |
| Actinobacteria  | Actinobacteria       | Actinomycetales    | Actinomycetaceae     | Actinomyces     | 0.00   | 0.00  | 0.00  | 0.00  | 0.00   | 0.00  | 0.00  | 0.00 | 0.00   | 0.00 | 0.00  | 0.00 |
| Actinobacteria  | Actinobacteria       | Actinomycetales    | Corynebacteriaceae   | Corynebacterium | 0.00   | 0.00  | 0.00  | 0.00  | 0.00   | 0.00  | 0.00  | 0.00 | 0.00   | 0.00 | 0.00  | 0.00 |
| Actinobacteria  | Actinobacteria       | Actinomycetales    | Microbacteriaceae    | Microbacterium  | 0.00   | 0.01  | 0.00  | 0.00  | 0.00   | 0.00  | 0.00  | 0.00 | 0.00   | 0.00 | 0.00  | 0.00 |
| Actinobacteria  | Actinobacteria       | Actinomycetales    | Nocardiaceae         | Rhodococcus     | 0.00   | 0.00  | 0.00  | 0.00  | 0.00   | 0.00  | 0.00  | 0.00 | 0.00   | 0.00 | 0.00  | 0.00 |
| Actinobacteria  | Actinobacteria       | Bifidobacteriales  | Bifidobacteriaceae   | Bifidobacterium | 0.00   | 0.00  | 0.18  | 0.43  | 0.00   | 0.00  | 0.47  | 1.08 | 0.00   | 0.00 | 0.00  | 0.00 |
| Actinobacteria  | Actinobacteria       | Coriobacteriales   | Coriobacteriaceae    | unknown         | 0.07   | 0.02  | 0.04  | 0.04  | 0.05   | 0.08  | 0.04  | 0.06 | 0.07   | 0.05 | 0.04  | 0.03 |
| Actinobacteria  | Actinobacteria       | Coriobacteriales   | Coriobacteriaceae    | unknown         | 0.07   | 0.06  | 0.25  | 0.18  | 0.09   | 0.06  | 0.27  | 0.35 | 0.08   | 0.05 | 0.13  | 0.13 |
| Actinobacteria  | Actinobacteria       | Coriobacteriales   | Coriobacteriaceae    | Adlercreutzia   | 0.64   | 0.31  | 0.89  | 0.22  | 0.68   | 0.35  | 0.98  | 0.21 | 0.54   | 0.15 | 1.59  | 0.77 |
| Aquificae       | Aquificae            | Aquificales        | Aquificaceae         | Hydrogenobacter | 0.00   | 0.00  | 0.00  | 0.00  | 0.00   | 0.00  | 0.00  | 0.00 | 0.00   | 0.00 | 0.00  | 0.00 |
| Bacteroidetes   | Bacteroidia          | Bacteroidales      | Bacteroidaceae       | Bacteroides     | 1.91   | 0.56  | 0.39  | 0.44  | 1.31   | 0.70  | 0.48  | 0.22 | 2.05   | 0.61 | 0.67  | 0.36 |
| Bacteroidetes   | Bacteroidia          | Bacteroidales      | Porphyromonadaceae   | Parabacteroides | 0.92   | 0.26  | 0.63  | 0.25  | 0.74   | 0.39  | 0.71  | 0.40 | 1.16   | 0.53 | 0.64  | 0.16 |
| Bacteroidetes   | Bacteroidia          | Bacteroidales      | Rikenellaceae        | unknown         | 0.00   | 0.00  | 0.19  | 0.45  | 0.00   | 0.00  | 0.00  | 0.00 | 0.00   | 0.00 | 0.00  | 0.00 |
| Bacteroidetes   | Bacteroidia          | Bacteroidales      | S24-7                | unknown         | 34.33  | 14.62 | 34.30 | 10.79 | 30.38  | 13.18 | 46.34 | 4.92 | 41.84  | 6.34 | 43.01 | 6.77 |

| Phylum                 | Class                      | Order                     | Family                        | Genus                       | naive  |      |       |      | CSDS   |       |       |      | Crp4   |      |       |      |
|------------------------|----------------------------|---------------------------|-------------------------------|-----------------------------|--------|------|-------|------|--------|-------|-------|------|--------|------|-------|------|
|                        |                            |                           |                               |                             | before |      | after |      | before |       | after |      | before |      | after |      |
|                        |                            |                           |                               |                             | Mean.  | SD   | Mean. | SD   | Mean.  | SD    | Mean. | SD   | Mean.  | SD   | Mean. | SD   |
| <i>Bacteroidetes</i>   | <i>Bacteroidia</i>         | <i>Bacteroidales</i>      | [ <i>Paraprevotellaceae</i> ] | [ <i>Prevotella</i> ]       | 0.00   | 0.00 | 1.07  | 1.22 | 0.00   | 0.00  | 0.66  | 1.23 | 0.00   | 0.00 | 0.00  | 0.00 |
| <i>Cyanobacteria</i>   | <i>Chloroplast</i>         | <i>Streptophyta</i>       | <i>unknown</i>                | <i>unknown</i>              | 0.00   | 0.00 | 0.00  | 0.00 | 0.00   | 0.00  | 0.00  | 0.00 | 0.00   | 0.00 | 0.00  | 0.00 |
| <i>Deferribacteres</i> | <i>Deferribacteres</i>     | <i>Deferribacterales</i>  | <i>Deferribacteraceae</i>     | <i>Mucispirillum</i>        | 0.25   | 0.15 | 0.05  | 0.03 | 0.48   | 0.51  | 0.04  | 0.03 | 0.19   | 0.13 | 0.03  | 0.02 |
| <i>Firmicutes</i>      | <i>unknown</i>             | <i>unknown</i>            | <i>unknown</i>                | <i>unknown</i>              | 0.00   | 0.00 | 0.00  | 0.00 | 0.00   | 0.00  | 0.00  | 0.00 | 0.00   | 0.00 | 0.00  | 0.00 |
| <i>Firmicutes</i>      | <i>Bacilli</i>             | <i>unknown</i>            | <i>unknown</i>                | <i>unknown</i>              | 0.00   | 0.00 | 0.00  | 0.00 | 0.00   | 0.00  | 0.00  | 0.00 | 0.00   | 0.00 | 0.00  | 0.00 |
| <i>Firmicutes</i>      | <i>Bacilli</i>             | <i>Bacillales</i>         | <i>Planococcaceae</i>         | <i>Sporosarcina</i>         | 0.00   | 0.00 | 0.00  | 0.00 | 0.00   | 0.00  | 0.00  | 0.00 | 0.00   | 0.00 | 0.00  | 0.00 |
| <i>Firmicutes</i>      | <i>Bacilli</i>             | <i>Bacillales</i>         | <i>Staphylococcaceae</i>      | <i>Jeotgaliococcus</i>      | 0.00   | 0.00 | 0.00  | 0.00 | 0.00   | 0.00  | 0.00  | 0.00 | 0.00   | 0.00 | 0.00  | 0.00 |
| <i>Firmicutes</i>      | <i>Bacilli</i>             | <i>Bacillales</i>         | <i>Staphylococcaceae</i>      | <i>Staphylococcus</i>       | 0.00   | 0.00 | 0.00  | 0.00 | 0.00   | 0.00  | 0.00  | 0.00 | 0.00   | 0.00 | 0.00  | 0.00 |
| <i>Firmicutes</i>      | <i>Bacilli</i>             | <i>Lactobacillales</i>    | <i>Enterococcaceae</i>        | <i>Enterococcus</i>         | 0.00   | 0.00 | 0.00  | 0.00 | 0.00   | 0.00  | 0.00  | 0.00 | 0.00   | 0.01 | 0.00  | 0.00 |
| <i>Firmicutes</i>      | <i>Bacilli</i>             | <i>Lactobacillales</i>    | <i>Lactobacillaceae</i>       | <i>unknown</i>              | 0.00   | 0.00 | 0.00  | 0.00 | 0.00   | 0.00  | 0.00  | 0.00 | 0.00   | 0.00 | 0.00  | 0.00 |
| <i>Firmicutes</i>      | <i>Bacilli</i>             | <i>Lactobacillales</i>    | <i>Lactobacillaceae</i>       | <i>Lactobacillus</i>        | 14.42  | 9.57 | 3.03  | 3.60 | 21.37  | 14.13 | 7.37  | 5.78 | 10.52  | 6.34 | 3.72  | 2.01 |
| <i>Firmicutes</i>      | <i>Bacilli</i>             | <i>Lactobacillales</i>    | <i>Leuconostocaceae</i>       | <i>unknown</i>              | 0.00   | 0.00 | 0.00  | 0.00 | 0.00   | 0.00  | 0.00  | 0.00 | 0.00   | 0.00 | 0.00  | 0.00 |
| <i>Firmicutes</i>      | <i>Bacilli</i>             | <i>Lactobacillales</i>    | <i>Leuconostocaceae</i>       | <i>Weissella</i>            | 0.00   | 0.00 | 0.00  | 0.00 | 0.00   | 0.00  | 0.00  | 0.00 | 0.00   | 0.00 | 0.00  | 0.00 |
| <i>Firmicutes</i>      | <i>Bacilli</i>             | <i>Lactobacillales</i>    | <i>Streptococcaceae</i>       | <i>Streptococcus</i>        | 0.00   | 0.00 | 0.01  | 0.01 | 0.00   | 0.00  | 0.01  | 0.01 | 0.00   | 0.00 | 0.01  | 0.02 |
| <i>Firmicutes</i>      | <i>Bacilli</i>             | <i>Turicibacterales</i>   | <i>Turicibacteraceae</i>      | <i>Turicibacter</i>         | 0.00   | 0.00 | 0.00  | 0.00 | 0.24   | 0.42  | 0.00  | 0.00 | 0.11   | 0.24 | 0.43  | 1.06 |
| <i>Firmicutes</i>      | <i>unknown</i>             | <i>unknown</i>            | <i>unknown</i>                | <i>unknown</i>              | 0.00   | 0.00 | 0.00  | 0.00 | 0.00   | 0.00  | 0.00  | 0.01 | 0.00   | 0.00 | 0.00  | 0.00 |
| <i>Firmicutes</i>      | <i>Clostridia</i>          | <i>Clostridiales</i>      | <i>unknown</i>                | <i>unknown</i>              | 7.23   | 5.44 | 12.62 | 5.23 | 6.18   | 2.83  | 6.20  | 2.42 | 6.02   | 2.46 | 5.07  | 1.74 |
| <i>Firmicutes</i>      | <i>Clostridia</i>          | <i>Clostridiales</i>      | <i>unknown</i>                | <i>unknown</i>              | 4.45   | 0.98 | 4.97  | 1.54 | 5.43   | 3.26  | 3.92  | 1.00 | 4.08   | 1.88 | 4.46  | 0.90 |
| <i>Firmicutes</i>      | <i>Clostridia</i>          | <i>Clostridiales</i>      | <i>Christensenellaceae</i>    | <i>unknown</i>              | 0.02   | 0.01 | 0.03  | 0.02 | 0.01   | 0.01  | 0.03  | 0.01 | 0.01   | 0.01 | 0.02  | 0.01 |
| <i>Firmicutes</i>      | <i>Clostridia</i>          | <i>Clostridiales</i>      | <i>Clostridiaceae</i>         | <i>andidatus Arthromitu</i> | 1.14   | 0.74 | 0.10  | 0.08 | 1.60   | 0.64  | 0.23  | 0.10 | 1.68   | 0.54 | 0.25  | 0.27 |
| <i>Firmicutes</i>      | <i>Clostridia</i>          | <i>Clostridiales</i>      | <i>Clostridiaceae</i>         | <i>Clostridium</i>          | 0.06   | 0.04 | 0.03  | 0.04 | 0.02   | 0.02  | 0.01  | 0.01 | 0.07   | 0.08 | 0.07  | 0.07 |
| <i>Firmicutes</i>      | <i>Clostridia</i>          | <i>Clostridiales</i>      | <i>Dehalobacteriaceae</i>     | <i>Dehalobacterium</i>      | 0.18   | 0.09 | 0.41  | 0.22 | 0.15   | 0.14  | 0.17  | 0.13 | 0.20   | 0.07 | 0.23  | 0.16 |
| <i>Firmicutes</i>      | <i>Clostridia</i>          | <i>Clostridiales</i>      | <i>Eubacteriaceae</i>         | <i>Anaerofustis</i>         | 0.01   | 0.01 | 0.01  | 0.01 | 0.00   | 0.00  | 0.00  | 0.01 | 0.01   | 0.01 | 0.00  | 0.00 |
| <i>Firmicutes</i>      | <i>Clostridia</i>          | <i>Clostridiales</i>      | <i>Lachnospiraceae</i>        | <i>unknown</i>              | 16.24  | 8.90 | 13.85 | 4.18 | 15.32  | 7.31  | 9.96  | 3.97 | 12.71  | 6.15 | 12.12 | 5.58 |
| <i>Firmicutes</i>      | <i>Clostridia</i>          | <i>Clostridiales</i>      | <i>Lachnospiraceae</i>        | <i>unknown</i>              | 1.31   | 1.04 | 2.32  | 1.08 | 1.03   | 0.69  | 0.99  | 0.73 | 1.13   | 0.66 | 1.20  | 0.93 |
| <i>Firmicutes</i>      | <i>Clostridia</i>          | <i>Clostridiales</i>      | <i>Lachnospiraceae</i>        | <i>Clostridium</i>          | 0.27   | 0.52 | 0.16  | 0.21 | 0.11   | 0.15  | 0.06  | 0.04 | 0.08   | 0.07 | 0.09  | 0.09 |
| <i>Firmicutes</i>      | <i>Clostridia</i>          | <i>Clostridiales</i>      | <i>Lachnospiraceae</i>        | <i>Coprococcus</i>          | 0.68   | 0.45 | 1.80  | 1.38 | 0.92   | 0.47  | 1.17  | 0.93 | 0.49   | 0.31 | 0.87  | 0.39 |
| <i>Firmicutes</i>      | <i>Clostridia</i>          | <i>Clostridiales</i>      | <i>Lachnospiraceae</i>        | <i>Dorea</i>                | 0.01   | 0.01 | 0.03  | 0.04 | 0.01   | 0.02  | 0.02  | 0.03 | 0.02   | 0.03 | 0.03  | 0.03 |
| <i>Firmicutes</i>      | <i>Clostridia</i>          | <i>Clostridiales</i>      | <i>Lachnospiraceae</i>        | <i>Roseburia</i>            | 0.12   | 0.11 | 0.23  | 0.34 | 0.12   | 0.14  | 0.17  | 0.16 | 0.10   | 0.15 | 0.16  | 0.19 |
| <i>Firmicutes</i>      | <i>Clostridia</i>          | <i>Clostridiales</i>      | <i>Lachnospiraceae</i>        | [ <i>Ruminococcus</i> ]     | 1.89   | 0.99 | 3.28  | 1.26 | 1.05   | 0.74  | 0.91  | 0.53 | 1.76   | 1.07 | 1.50  | 0.93 |
| <i>Firmicutes</i>      | <i>Clostridia</i>          | <i>Clostridiales</i>      | <i>Peptococcaceae</i>         | <i>unknown</i>              | 0.00   | 0.00 | 0.00  | 0.00 | 0.00   | 0.00  | 0.00  | 0.00 | 0.00   | 0.00 | 0.00  | 0.00 |
| <i>Firmicutes</i>      | <i>Clostridia</i>          | <i>Clostridiales</i>      | <i>Peptococcaceae</i>         | <i>unknown</i>              | 0.02   | 0.02 | 0.07  | 0.07 | 0.04   | 0.02  | 0.05  | 0.03 | 0.03   | 0.02 | 0.05  | 0.03 |
| <i>Firmicutes</i>      | <i>Clostridia</i>          | <i>Clostridiales</i>      | <i>Peptococcaceae</i>         | <i>rc4-4</i>                | 0.85   | 0.55 | 0.82  | 0.59 | 1.12   | 0.52  | 1.48  | 0.39 | 0.88   | 0.46 | 1.87  | 0.67 |
| <i>Firmicutes</i>      | <i>Clostridia</i>          | <i>Clostridiales</i>      | <i>Ruminococcaceae</i>        | <i>unknown</i>              | 0.96   | 0.58 | 0.93  | 0.54 | 0.69   | 0.59  | 0.43  | 0.17 | 0.55   | 0.12 | 0.39  | 0.18 |
| <i>Firmicutes</i>      | <i>Clostridia</i>          | <i>Clostridiales</i>      | <i>Ruminococcaceae</i>        | <i>unknown</i>              | 0.73   | 0.33 | 1.30  | 0.56 | 0.68   | 0.25  | 1.25  | 0.54 | 1.00   | 0.49 | 2.38  | 1.23 |
| <i>Firmicutes</i>      | <i>Clostridia</i>          | <i>Clostridiales</i>      | <i>Ruminococcaceae</i>        | <i>Anaerotruncus</i>        | 0.15   | 0.09 | 0.29  | 0.12 | 0.16   | 0.12  | 0.12  | 0.08 | 0.11   | 0.07 | 0.11  | 0.08 |
| <i>Firmicutes</i>      | <i>Clostridia</i>          | <i>Clostridiales</i>      | <i>Ruminococcaceae</i>        | <i>Butyrivibrio</i>         | 0.32   | 0.29 | 0.58  | 0.58 | 0.15   | 0.17  | 0.21  | 0.17 | 0.27   | 0.19 | 0.16  | 0.12 |
| <i>Firmicutes</i>      | <i>Clostridia</i>          | <i>Clostridiales</i>      | <i>Ruminococcaceae</i>        | <i>Gemmiger</i>             | 0.48   | 0.60 | 0.05  | 0.04 | 0.14   | 0.15  | 0.04  | 0.02 | 0.12   | 0.03 | 0.04  | 0.02 |
| <i>Firmicutes</i>      | <i>Clostridia</i>          | <i>Clostridiales</i>      | <i>Ruminococcaceae</i>        | <i>Oscillospira</i>         | 4.80   | 2.84 | 5.31  | 2.64 | 4.19   | 2.33  | 3.21  | 1.51 | 3.86   | 1.26 | 3.05  | 1.77 |
| <i>Firmicutes</i>      | <i>Clostridia</i>          | <i>Clostridiales</i>      | <i>Ruminococcaceae</i>        | <i>Ruminococcus</i>         | 1.63   | 1.11 | 1.43  | 0.39 | 1.52   | 0.95  | 0.90  | 0.36 | 1.88   | 1.12 | 1.37  | 1.12 |
| <i>Firmicutes</i>      | <i>Clostridia</i>          | <i>Clostridiales</i>      | [ <i>Mogibacteriaceae</i> ]   | <i>unknown</i>              | 0.13   | 0.04 | 0.19  | 0.04 | 0.13   | 0.09  | 0.12  | 0.02 | 0.12   | 0.05 | 0.17  | 0.06 |
| <i>Firmicutes</i>      | <i>Erysipelotrichi</i>     | <i>Erysipelotrichales</i> | <i>Erysipelotrichaceae</i>    | <i>unknown</i>              | 0.01   | 0.03 | 0.02  | 0.01 | 0.06   | 0.05  | 0.02  | 0.02 | 0.07   | 0.03 | 0.03  | 0.05 |
| <i>Firmicutes</i>      | <i>Erysipelotrichi</i>     | <i>Erysipelotrichales</i> | <i>Erysipelotrichaceae</i>    | <i>unknown</i>              | 1.10   | 0.84 | 0.29  | 0.33 | 0.95   | 0.37  | 0.24  | 0.20 | 1.57   | 0.71 | 0.20  | 0.12 |
| <i>Firmicutes</i>      | <i>Erysipelotrichi</i>     | <i>Erysipelotrichales</i> | <i>Erysipelotrichaceae</i>    | <i>Allobaculum</i>          | 1.23   | 2.48 | 5.51  | 3.15 | 1.25   | 2.06  | 8.21  | 4.55 | 2.45   | 2.05 | 10.89 | 6.76 |
| <i>Firmicutes</i>      | <i>Erysipelotrichi</i>     | <i>Erysipelotrichales</i> | <i>Erysipelotrichaceae</i>    | <i>Clostridium</i>          | 0.28   | 0.34 | 0.04  | 0.06 | 0.14   | 0.11  | 0.05  | 0.06 | 0.22   | 0.19 | 0.05  | 0.04 |
| <i>Firmicutes</i>      | <i>Erysipelotrichi</i>     | <i>Erysipelotrichales</i> | <i>Erysipelotrichaceae</i>    | <i>Coprobacillus</i>        | 0.15   | 0.16 | 0.02  | 0.03 | 0.12   | 0.06  | 0.01  | 0.02 | 0.29   | 0.30 | 0.03  | 0.04 |
| <i>Proteobacteria</i>  | <i>Alphaproteobacteria</i> | <i>Rhizobiales</i>        | <i>Methylbacteriaceae</i>     | <i>Methylbacterium</i>      | 0.00   | 0.00 | 0.00  | 0.00 | 0.00   | 0.00  | 0.00  | 0.00 | 0.00   | 0.00 | 0.00  | 0.00 |
| <i>Proteobacteria</i>  | <i>Alphaproteobacteria</i> | <i>Rickettsiales</i>      | <i>mitochondria</i>           | <i>unknown</i>              | 0.00   | 0.00 | 0.00  | 0.00 | 0.00   | 0.00  | 0.00  | 0.00 | 0.00   | 0.00 | 0.00  | 0.00 |
| <i>Proteobacteria</i>  | <i>Betaproteobacteria</i>  | <i>Burkholderiales</i>    | <i>Alcaligenaceae</i>         | <i>Sutterella</i>           | 0.24   | 0.16 | 0.58  | 0.24 | 0.28   | 0.25  | 0.81  | 0.27 | 0.53   | 0.29 | 0.95  | 0.33 |
| <i>Proteobacteria</i>  | <i>Betaproteobacteria</i>  | <i>Burkholderiales</i>    | <i>Oxalobacteraceae</i>       | <i>Herbaspirillum</i>       | 0.00   | 0.00 | 0.00  | 0.00 | 0.00   | 0.00  | 0.00  | 0.00 | 0.00   | 0.00 | 0.00  | 0.00 |
| <i>Proteobacteria</i>  | <i>Deltaproteobacteria</i> | <i>Desulfovibrionales</i> | <i>Desulfovibrionaceae</i>    | <i>Desulfovibrio</i>        | 0.00   | 0.00 | 0.43  | 1.05 | 0.00   | 0.00  | 0.00  | 0.00 | 0.00   | 0.00 | 0.00  | 0.00 |
| <i>Proteobacteria</i>  | <i>Gammaproteobacteria</i> | <i>Enterobacteriales</i>  | <i>Enterobacteriaceae</i>     | <i>unknown</i>              | 0.00   | 0.01 | 0.00  | 0.00 | 0.01   | 0.01  | 0.00  | 0.02 | 0.04   | 0.00 | 0.01  | 0.01 |
| <i>Proteobacteria</i>  | <i>Gammaproteobacteria</i> | <i>Pseudomonadales</i>    | <i>Moraxellaceae</i>          | <i>Acinetobacter</i>        | 0.00   | 0.00 | 0.00  | 0.00 | 0.00   | 0.00  | 0.00  | 0.00 | 0.00   | 0.00 | 0.00  | 0.00 |
| <i>TM7</i>             | <i>TM7-3</i>               | <i>CW040</i>              | <i>F16</i>                    | <i>unknown</i>              | 0.00   | 0.00 | 0.01  | 0.02 | 0.00   | 0.00  | 0.00  | 0.00 | 0.00   | 0.00 | 0.00  | 0.00 |
| <i>Tenericutes</i>     | <i>Mollicutes</i>          | <i>Anaeroplasmatales</i>  | <i>Anaeroplasmataceae</i>     | <i>Anaeroplasma</i>         | 0.01   | 0.01 | 0.02  | 0.03 | 0.06   | 0.13  | 0.03  | 0.05 | 0.01   | 0.01 | 0.02  | 0.03 |
| <i>Tenericutes</i>     | <i>Mollicutes</i>          | <i>RF39</i>               | <i>unknown</i>                | <i>unknown</i>              | 0.26   | 0.11 | 0.08  | 0.03 | 0.26   | 0.21  | 0.13  | 0.06 | 0.19   | 0.10 | 0.13  | 0.05 |
| <i>Verrucomicrobia</i> | <i>Verrucomicrobiae</i>    | <i>Verrucomicrobiales</i> | <i>Verrucomicrobiaceae</i>    | <i>Akkermansia</i>          | 0.39   | 0.54 | 1.18  | 2.60 | 0.72   | 1.06  | 1.44  | 1.16 | 0.81   | 0.87 | 1.74  | 2.04 |

Supplementary Table 3 Fecal metabolites (relative area vs internal standard)

| Compound name                                              | naive   |         | CSDS    |         | Crp4    |         |
|------------------------------------------------------------|---------|---------|---------|---------|---------|---------|
|                                                            | Mean    | S.D.    | Mean    | S.D.    | Mean    | S.D.    |
| 1,3-Diaminopropane                                         | 0.00062 | 0.00017 | 0.00069 | 0.00033 | 0.00095 | 0.00040 |
| 1-Aminocyclopropane-1-carboxylic acid<br>Homoserinelactone | N.D.    | N.D.    | 0.00021 | N.D.    | N.D.    | N.D.    |
| 1-Methyl-4-imidazoleacetic acid                            | 0.01698 | 0.00254 | 0.01502 | 0.00297 | 0.01868 | 0.00465 |
| 1-Methyladenosine                                          | 0.00020 | 0.00004 | 0.00028 | 0.00006 | 0.00028 | 0.00007 |
| 1-Methylhistidine<br>3-Methylhistidine                     | 0.00177 | 0.00045 | 0.00130 | 0.00027 | 0.00192 | 0.00064 |
| 1 <i>H</i> -Imidazole-4-propionic acid                     | 0.01659 | 0.00977 | 0.00466 | 0.00346 | 0.01926 | 0.01276 |
| 2'or5'-Deoxyadenosine                                      | 0.00178 | 0.00076 | 0.00284 | 0.00131 | 0.00290 | 0.00182 |
| 2'-Deoxycytidine                                           | 0.00159 | 0.00031 | 0.00193 | 0.00063 | 0.00188 | 0.00093 |
| 2'-Deoxyguanosine                                          | 0.00088 | 0.00027 | 0.00102 | 0.00042 | 0.00132 | 0.00067 |
| 2,4-Diaminobutyric acid                                    | 0.00105 | 0.00122 | 0.00055 | N.D.    | 0.00072 | 0.00035 |
| 2,5-Dihydroxybenzoic acid                                  | 0.00026 | 0.00007 | 0.00041 | 0.00025 | 0.00023 | 0.00003 |
| 2,5-Pyrroledione                                           | 0.00047 | 0.00008 | 0.00072 | 0.00030 | 0.00071 | 0.00001 |
| 2,6-Diaminopimelic acid                                    | 0.00348 | 0.00036 | 0.00366 | 0.00104 | 0.00477 | 0.00085 |
| 2-(Creatinine-3-yl)propionic acid                          | 0.00250 | 0.00039 | 0.00275 | 0.00066 | 0.00277 | 0.00040 |
| 2-Amino-2-(hydroxymethyl)-1,3-propanediol                  | 0.00050 | 0.00012 | 0.00061 | 0.00015 | 0.00055 | 0.00010 |
| 2-Amino-2-methyl-1,3-propanediol                           | 0.00042 | 0.00003 | 0.00037 | 0.00004 | 0.00047 | 0.00008 |
| 2-Aminoethylphosphonic acid                                | 0.00030 | 0.00014 | 0.00023 | 0.00010 | 0.00022 | 0.00006 |
| 2-Aminoisobutyric acid<br>2-Aminobutyric acid              | 0.01132 | 0.00416 | 0.00758 | 0.00301 | 0.01013 | 0.00314 |
| 2-Deoxyglucose 6-phosphate                                 | 0.00029 | 0.00006 | 0.00017 | N.D.    | 0.00027 | 0.00011 |
| 2-Deoxyribose 1-phosphate                                  | 0.00201 | 0.00059 | 0.00163 | 0.00087 | 0.00295 | 0.00117 |
| 2-Hydroxy-4-methylvaleric acid                             | 0.00738 | 0.00340 | 0.00454 | 0.00159 | 0.00524 | 0.00337 |
| 2-Hydroxybutyric acid                                      | 0.00075 | 0.00035 | 0.00027 | 0.00007 | 0.00087 | 0.00072 |
| 2-Hydroxyisobutyric acid                                   | 0.00013 | N.D.    | N.D.    | N.D.    | N.D.    | N.D.    |
| 2-Hydroxypyridine                                          | N.D.    | N.D.    | N.D.    | N.D.    | 0.00011 | 0.00001 |
| 2-Hydroxyvaleric acid                                      | 0.00307 | 0.00148 | 0.00154 | 0.00046 | 0.00216 | 0.00139 |
| 2-Isopropylmalic acid                                      | 0.00033 | 0.00011 | 0.00039 | 0.00011 | 0.00020 | 0.00009 |
| 2-Methylserine                                             | 0.00044 | 0.00022 | 0.00035 | 0.00003 | 0.00051 | 0.00008 |
| 2-Oxoglutaric acid                                         | 0.01308 | 0.00695 | 0.00565 | 0.00175 | 0.01401 | 0.00670 |
| 2-Oxoisovaleric acid                                       | 0.00415 | 0.00184 | 0.00237 | 0.00056 | 0.00352 | 0.00138 |
| 3'-AMP                                                     | 0.00039 | 0.00035 | 0.00018 | 0.00005 | 0.00016 | 0.00003 |
| 3'-CMP<br>2'-CMP                                           | 0.00050 | 0.00058 | 0.00024 | 0.00014 | 0.00029 | 0.00010 |
| 3,4-Dihydroxyphenylglycol                                  | 0.00031 | 0.00005 | 0.00031 | 0.00002 | 0.00031 | 0.00007 |
| 3-(4-Hydroxyphenyl)propionic acid                          | 0.01299 | 0.00511 | 0.02230 | 0.01493 | 0.00681 | 0.00218 |
| 3-Amino-2-piperidone                                       | 0.00039 | 0.00008 | 0.00039 | 0.00011 | 0.00038 | 0.00008 |
| 3-Aminobutyric acid                                        | 0.00078 | 0.00016 | 0.00041 | 0.00006 | 0.00110 | 0.00070 |
| 3-Aminoisobutyric acid                                     | 0.00099 | 0.00024 | 0.00112 | 0.00039 | 0.00112 | 0.00037 |
| 3-Aminopropane-1,2-diol                                    | 0.00029 | N.D.    | 0.00048 | 0.00021 | 0.00034 | 0.00008 |
| 3-Dehydroshikimic acid                                     | 0.00019 | 0.00006 | 0.00018 | 0.00005 | 0.00014 | 0.00003 |
| 3-Hydroxy-3-methylglutaric acid                            | 0.00042 | 0.00007 | 0.00047 | 0.00016 | 0.00030 | 0.00004 |
| 3-Hydroxybutyric acid                                      | 0.00145 | 0.00098 | 0.00048 | 0.00017 | 0.00079 | 0.00074 |
| 3-Hydroxypropionic acid                                    | 0.00132 | 0.00038 | N.D.    | N.D.    | 0.00159 | 0.00025 |
| 3-Methoxytyrosine                                          | 0.00029 | 0.00007 | N.D.    | N.D.    | 0.00026 | N.D.    |
| 3-Methylguanine                                            | 0.00059 | 0.00009 | 0.00050 | 0.00015 | 0.00060 | 0.00012 |
| 3-Phenylpropionic acid                                     | 0.00952 | 0.00353 | 0.00610 | 0.00127 | 0.00872 | 0.00247 |
| 3-Phosphoglyceric acid                                     | 0.00021 | N.D.    | N.D.    | N.D.    | N.D.    | N.D.    |
| 4-( $\beta$ -Acetylaminoethyl)imidazole                    | 0.00041 | 0.00034 | 0.00045 | 0.00025 | 0.00084 | 0.00089 |
| 4-Acetamidobutanoic acid                                   | 0.00020 | 0.00008 | 0.00014 | N.D.    | 0.00028 | 0.00008 |
| 4-Guanidinobutyric acid                                    | 0.00037 | 0.00008 | 0.00038 | 0.00009 | 0.00023 | N.D.    |
| 4-Methyl-2-oxovaleric acid<br>3-Methyl-2-oxovaleric acid   | 0.01813 | 0.00679 | 0.01155 | 0.00206 | 0.01713 | 0.00636 |
| 4-Methyl-5-thiazoleethanol                                 | 0.00018 | 0.00006 | 0.00017 | 0.00006 | 0.00022 | 0.00009 |
| 4-Methylthio-2-oxobutyric acid                             | 0.00054 | 0.00016 | 0.00022 | 0.00006 | 0.00042 | 0.00015 |
| 4-Pyridoxic acid                                           | 0.00257 | 0.00024 | 0.00238 | 0.00043 | 0.00246 | 0.00043 |

| Compound name                           | naive    |          | CSDS     |          | Crp4        |          |
|-----------------------------------------|----------|----------|----------|----------|-------------|----------|
|                                         | Mean     | S.D.     | Mean     | S.D.     | Mean        | S.D.     |
| Compound name                           | Control  |          | Stress   |          | Stress+Crp4 |          |
|                                         | Mean     | S.D.     | Mean     | S.D.     | Mean        | S.D.     |
| 5-Aminovaleric acid                     | 0.121962 | 0.058019 | 0.065527 | 0.060502 | 0.051636    | 0.031686 |
| 5-Hydroxyindoleacetic acid              | 0.00025  | 9.38E-05 | 0.000318 | 8.07E-05 | 0.000262    | 0.000125 |
| 5-Hydroxylysine                         | 0.001598 | 0.000181 | 0.001918 | 0.00112  | 0.001549    | 0.000404 |
| 5-Methoxyindoleacetic acid              | 0.00013  | 4.52E-05 | 0.00014  | 3.44E-05 | 0.000143    | 2.86E-05 |
| 5-Methyl-2'-deoxycytidine               | 0.000412 | 7.13E-05 | 0.00042  | 8.14E-05 | 0.000425    | 1E-04    |
| 5-Methylcytosine                        | 0.000148 | N.D.     | 0.000154 | N.D.     | N.D.        | N.D.     |
| 5-Oxo-2-tetrahydrofuran carboxylic acid | N.D.     | N.D.     | N.D.     | N.D.     | 0.000208    | 6E-05    |
| 5-Oxoproline                            | 0.002184 | 0.00109  | 0.001006 | 0.000206 | 0.002091    | 0.001122 |
| 6-Aminohexanoic acid                    | 0.003918 | 0.001162 | 0.002886 | 0.000233 | 0.003941    | 0.00108  |
| 6-Hydroxyhexanoic acid                  | 0.000778 | 0.000153 | 0.000553 | 0.000223 | 0.000562    | 0.000328 |
| 6-Hydroxynicotinic acid                 | 0.000321 | 0.000151 | 0.000178 | 8.19E-05 | 0.000457    | 0.000308 |
| 7-Methylguanine                         | 0.00148  | 0.00047  | 0.000798 | 0.000201 | 0.001433    | 0.000533 |
| 8-Hydroxyoctanoic acid                  | 0.000133 | 3.21E-05 | 0.000146 | 3.12E-05 | 0.000129    | 2.61E-05 |
| Acetoacetic acid                        | 0.000345 | 1.52E-06 | 9.82E-05 | N.D.     | 0.000292    | 0.000195 |
| Adenine                                 | 0.00791  | 0.00439  | 0.015402 | 0.007931 | 0.00817     | 0.003894 |
| Adenosine                               | 0.00131  | 0.000632 | 0.002799 | 0.001287 | 0.00234     | 0.001388 |
| Adipic acid                             | N.D.     | N.D.     | N.D.     | N.D.     | 0.000249    | N.D.     |
| Ala                                     | 0.398698 | 0.108875 | 0.340303 | 0.065558 | 0.434838    | 0.140068 |
| allo-Threonine                          | 0.000706 | 0.00017  | 0.000584 | 0.00013  | 0.000743    | 0.000244 |
| Alloisoleucine                          | 0.003497 | 0.002071 | 0.002386 | 0.000602 | 0.003021    | 0.001628 |
| AMP                                     | 0.00012  | 2.5E-05  | 0.000124 | 1.33E-06 | 0.000146    | N.D.     |
| Anserine_divalent                       | 0.000491 | 5.44E-05 | 0.000442 | 9.16E-05 | 0.000554    | 5.61E-05 |
| Arg                                     | 0.011764 | 0.002765 | 0.0125   | 0.008677 | 0.013648    | 0.004047 |
| Arg-Glu                                 | 0.000777 | 0.000206 | 0.000594 | 0.000155 | 0.000904    | 0.000279 |
| Argininosuccinic acid                   | N.D.     | N.D.     | 0.000232 | 5.88E-05 | 0.000145    | 3.57E-05 |
| Ascorbate 2-glucoside                   | 0.00062  | 0.000145 | 0.000613 | 0.000169 | 0.000726    | 0.000116 |
| Ascorbic acid                           | 0.000159 | 6.78E-05 | 0.000181 | 4.15E-06 | 0.000123    | 1.96E-05 |
| Asn                                     | 0.000503 | N.D.     | 0.000932 | 0.000372 | 0.000657    | 0.000135 |
| Asp                                     | 0.164454 | 0.098352 | 0.1024   | 0.04329  | 0.140979    | 0.072573 |
| Azelaic acid                            | 0.002671 | 0.000855 | 0.002128 | 0.000592 | 0.002133    | 0.001003 |
| Azetidine 2-carboxylic acid             | N.D.     | N.D.     | 0.000548 | N.D.     | N.D.        | N.D.     |
| Betaine                                 | 0.005847 | 0.000978 | 0.006558 | 0.002688 | 0.005662    | 0.00153  |
| Betaine aldehyde +H <sub>2</sub> O      | 0.000376 | 0.000118 | 0.000417 | 0.000205 | 0.000345    | 4.92E-05 |
| Betonicine                              | N.D.     | N.D.     | 0.000339 | 0.000114 | N.D.        | N.D.     |
| Cadaverine                              | 0.00036  | 0.000137 | 0.000665 | 0.000179 | 0.000285    | 7.35E-05 |
| cAMP                                    | 0.000173 | 4.49E-05 | 0.000158 | 3.9E-05  | 0.000161    | 3.53E-05 |
| Carboxymethyllysine                     | 0.001095 | 0.000223 | 0.000819 | 0.000145 | 0.001113    | 0.000325 |
| Carnitine                               | 0.001184 | 0.000325 | 0.001181 | 0.000276 | 0.001322    | 0.000346 |
| Cholic acid                             | 0.160209 | 0.091828 | 0.168993 | 0.071684 | 0.184877    | 0.035942 |
| Choline                                 | 0.026136 | 0.004774 | 0.031314 | 0.005141 | 0.020295    | 0.006615 |
| Cimetidine                              | 0.000657 | 0.000143 | 0.000768 | 0.000269 | 0.00072     | 5.37E-05 |
| cIMP                                    | 0.00013  | 4.95E-05 | 0.000135 | 3.12E-05 | 0.000144    | 1.96E-05 |
| cis-4-Hydroxyproline                    | 0.000713 | 0.000258 | 0.00046  | 7.5E-05  | 0.000595    | 0.000241 |
| Citraconic acid                         | 0.00037  | 9.66E-05 | 0.000168 | 2.47E-05 | 0.000359    | 0.000164 |
| Citramalic acid                         | 0.000984 | 0.000298 | 0.000464 | 4.94E-05 | 0.000786    | 8.94E-05 |
| Citric acid                             | 0.007782 | 0.004426 | 0.00706  | 0.002208 | 0.004829    | 0.001351 |
| Citrulline                              | 0.025209 | 0.008405 | 0.020051 | 0.008897 | 0.031702    | 0.011937 |
| CMP                                     | 0.000136 | 1.34E-05 | 0.000156 | 6.32E-05 | 0.000224    | N.D.     |
| CMP-N-acetylneuraminate                 | N.D.     | N.D.     | 7.51E-05 | N.D.     | N.D.        | N.D.     |
| Creatine                                | 0.000279 | 7.02E-05 | 0.004302 | 0.007819 | 0.00024     | 7.51E-05 |
| Creatinine                              | 0.000428 | 0.000133 | 0.001208 | 0.001492 | 0.000556    | 0.000118 |
| Crotonic acid                           | 0.00019  | 1.2E-05  | 0.000224 | N.D.     | N.D.        | N.D.     |
| Cyclohexanecarboxylic acid              | 0.000127 | 1.87E-05 | 0.000137 | 5.33E-05 | N.D.        | N.D.     |



| Compound name                            | naive    |          | CSDS     |          | Crp4     |          |
|------------------------------------------|----------|----------|----------|----------|----------|----------|
|                                          | Mean     | S.D.     | Mean     | S.D.     | Mean     | S.D.     |
| Cysteic acid                             | 0.00182  | 0.000681 | 0.001128 | 0.000221 | 0.001973 | 0.000756 |
| Cystine                                  | 0.00015  | 2.21E-05 | 0.000244 | N.D.     | 0.000196 | N.D.     |
| Cytidine                                 | 0.003416 | 0.000496 | 0.003758 | 0.001215 | 0.003442 | 0.000882 |
| Cytosine                                 | 0.001805 | 0.002059 | 0.00252  | 0.002674 | 0.000963 | 0.000344 |
| Daminozide<br>Ala-Ala                    | 0.011289 | 0.004895 | 0.004629 | 0.001741 | 0.010773 | 0.005418 |
| dAMP                                     | 0.000244 | 9.42E-05 | 0.000203 | 5.32E-05 | 0.00017  | 5.8E-05  |
| dCMP                                     | 0.000348 | 0.000207 | 0.00037  | 0.000291 | 0.00037  | 0.00023  |
| Diethanolamine                           | 0.000777 | 0.00052  | 0.001787 | 0.001552 | 0.000949 | 0.00065  |
| Digalacturonic acid                      | 0.000368 | 0.000197 | 0.000801 | 0.00056  | 0.000219 | 0.000107 |
| Dihydroxyacetone phosphate               | 0.000738 | 0.000204 | 0.000457 | 0.000266 | 0.000623 | 0.000215 |
| Diphenylcarbazine                        | 0.004342 | 0.000415 | 0.004317 | 0.001126 | 0.005229 | 0.000534 |
| Dodecanedioic acid                       | 0.002253 | 0.000684 | 0.001541 | 0.000596 | 0.001643 | 0.000852 |
| dTMP                                     | 0.000287 | 0.000128 | 0.000326 | 0.000218 | 0.000375 | 0.000136 |
| Dyphylline                               | 0.004477 | 0.002493 | 0.00652  | 0.003419 | 0.005896 | 0.003583 |
| Ectoine                                  | 0.000519 | 0.000384 | 0.000575 | 0.000208 | N.D.     | N.D.     |
| Erythrose 4-phosphate                    | 0.000124 | N.D.     | N.D.     | N.D.     | 0.000132 | N.D.     |
| Ethanolamine                             | 0.019544 | 0.003553 | 0.01593  | 0.00397  | 0.017658 | 0.005333 |
| Ethyl glucuronide                        | 0.001471 | 0.000178 | 0.001391 | 0.000354 | 0.00163  | 0.000212 |
| Ferulic acid                             | 0.002634 | 0.001427 | 0.007124 | 0.002859 | 0.002101 | 0.001247 |
| FMN                                      | 0.000167 | 4.67E-05 | N.D.     | N.D.     | 0.000213 | 3.84E-05 |
| Formiminoglutamic acid                   | 0.001621 | 0.000734 | 0.00089  | 0.000233 | 0.001729 | 0.000601 |
| Fructose 6-phosphate                     | 0.000412 | 0.000268 | 0.000182 | 6.82E-05 | 0.000373 | 0.00038  |
| Fumaric acid                             | 0.004364 | 0.001782 | 0.004348 | 0.001627 | 0.004619 | 0.003404 |
| GABA                                     | 0.005402 | 0.001075 | 0.005799 | 0.001368 | 0.008411 | 0.007119 |
| Galactosamine<br>Glucosamine             | 0.001852 | 0.001723 | 0.001163 | 0.00045  | 0.002623 | 0.002076 |
| Gln                                      | 0.031105 | 0.012118 | 0.026783 | 0.016563 | 0.033027 | 0.009169 |
| Glu                                      | 0.680785 | 0.265032 | 0.295855 | 0.057193 | 0.728424 | 0.321606 |
| Glu-Glu                                  | 0.000816 | 0.00024  | 0.000737 | 0.000222 | 0.000737 | 0.000165 |
| Glucaric acid                            | 0.000135 | 4.05E-05 | 0.000302 | 0.000119 | 0.000191 | 7.37E-05 |
| Gluconic acid                            | 0.001858 | 0.000981 | 0.001834 | 0.000593 | 0.001121 | 0.000461 |
| Gluconolactone                           | 0.001318 | 0.000455 | 0.001401 | 7.88E-05 | 0.00127  | 0.000101 |
| Glucosamine 6-phosphate                  | 0.000135 | N.D.     | N.D.     | N.D.     | N.D.     | N.D.     |
| Glucose 1-phosphate                      | 0.000681 | 0.00034  | 0.00021  | 6.24E-05 | 0.000627 | 0.000492 |
| Glucose 6-phosphate                      | 0.000929 | 0.001268 | 0.000464 | 0.000463 | 0.000541 | 0.00072  |
| Glucuronic acid-1<br>Galacturonic acid-1 | 0.002598 | 0.000928 | 0.002654 | 0.000629 | 0.00186  | 0.000256 |
| Glucuronic acid-2<br>Galacturonic acid-2 | 0.012901 | 0.005743 | 0.01471  | 0.0046   | 0.007941 | 0.001004 |
| Glutaric acid                            | 0.001023 | 0.000268 | 0.000943 | 0.000332 | 0.000966 | 0.000306 |
| Gly                                      | 0.086458 | 0.026444 | 0.061047 | 0.019617 | 0.07631  | 0.024031 |
| Gly-Asp                                  | 0.001115 | 0.000216 | 0.001203 | 0.000267 | 0.001114 | 0.000366 |
| Gly-Gly                                  | 0.001176 | 0.00018  | 0.001329 | 0.000525 | 0.00108  | 0.000204 |
| Gly-Leu                                  | 0.003396 | 0.000838 | 0.003511 | 0.001856 | 0.003546 | 0.001179 |
| Glyceric acid                            | 0.011923 | 0.003287 | 0.011125 | 0.002635 | 0.006561 | 0.001177 |
| Glycerol                                 | 0.173539 | 0.030253 | 0.194803 | 0.049306 | 0.190731 | 0.035331 |
| Glycerol 2-phosphate                     | 0.000116 | 1.19E-05 | N.D.     | N.D.     | N.D.     | N.D.     |
| Glycerol 3-phosphate                     | 0.000877 | 0.000204 | 0.001227 | 0.000371 | 0.000835 | 0.000345 |
| Glycolic acid                            | 0.003042 | 0.00052  | 0.001861 | 0.000741 | 0.001793 | 0.000233 |
| GMP                                      | N.D.     | N.D.     | 9.56E-05 | N.D.     | N.D.     | N.D.     |
| Guanine                                  | 0.002296 | 0.000696 | 0.00368  | 0.001307 | 0.003577 | 0.001996 |
| Guanosine                                | 0.000762 | 0.00044  | 0.001154 | 0.000594 | 0.001506 | 0.000776 |
| Heptanoic acid                           | 0.000234 | 1.55E-05 | 0.000166 | 3.04E-05 | N.D.     | N.D.     |
| Hexanoic acid                            | 0.000701 | 0.000277 | 0.000418 | 0.000103 | 0.001059 | 0.000782 |
| His                                      | 0.019968 | 0.003811 | 0.017665 | 0.007798 | 0.015841 | 0.002864 |
| His-Glu                                  | 0.000209 | 5.46E-05 | 0.000194 | 8.18E-05 | 0.00024  | 5.57E-05 |

| Compound name                                                       | naive    |          | CSDS     |          | Crp4     |          |
|---------------------------------------------------------------------|----------|----------|----------|----------|----------|----------|
|                                                                     | Mean     | S.D.     | Mean     | S.D.     | Mean     | S.D.     |
| Histamine                                                           | 0.000193 | N.D.     | 0.000243 | N.D.     | 0.000528 | 0.000205 |
| Histidinol                                                          | N.D.     | N.D.     | N.D.     | N.D.     | 7.8E-05  | N.D.     |
| Homocarnosine                                                       | 0.000135 | 3.47E-05 | 0.000147 | 2.19E-05 | 0.000117 | 2.48E-06 |
| Homocitrulline                                                      | 0.000822 | 0.000128 | 0.000722 | 0.000199 | 0.000762 | 0.00022  |
| Homocysteic acid                                                    | 0.000105 | 1.18E-05 | 0.00011  | 1.74E-05 | 0.000116 | 2.34E-05 |
| Homoserine                                                          | 0.006423 | 0.002163 | 0.003212 | 0.000698 | 0.006893 | 0.003136 |
| Homovanillic acid                                                   | 0.00078  | 0.000273 | 0.000405 | 6.02E-05 | 0.000785 | 0.000315 |
| Hydroxyindole                                                       | 0.001887 | 0.000222 | 0.001856 | 0.000297 | 0.00215  | 0.000481 |
| Hydroxyproline                                                      | 0.010616 | 0.004134 | 0.008793 | 0.002994 | 0.007968 | 0.00395  |
| Hypotaurine                                                         | 0.000435 | 0.000151 | 0.000408 | 3.02E-05 | 0.000454 | 7.16E-05 |
| Hypoxanthine                                                        | 0.159686 | 0.059208 | 0.076001 | 0.030919 | 0.147222 | 0.048871 |
| Ile                                                                 | 0.152056 | 0.033504 | 0.110904 | 0.04063  | 0.139863 | 0.044727 |
| Imidazole-4-acetic acid                                             | N.D.     | N.D.     | 0.00033  | N.D.     | 0.000336 | 0.000308 |
| Imidazole-4-methanol                                                | 0.000481 | 0.000213 | 0.000527 | 0.000125 | 0.000479 | 0.000256 |
| Imidazolelactic acid                                                | 0.000275 | 0.000113 | 0.000471 | 0.00017  | 0.000362 | 0.000176 |
| Indole-3-acetic acid                                                | 0.000274 | 7.34E-05 | 0.000315 | 8.43E-05 | 0.000231 | 8.23E-05 |
| Inosine                                                             | 0.008574 | 0.003988 | 0.005917 | 0.005153 | 0.016578 | 0.014507 |
| Isethionic acid                                                     | 0.00122  | 0.002072 | 0.000381 | 0.00022  | 0.000369 | 0.000171 |
| Isoamylamine                                                        | N.D.     | N.D.     | N.D.     | N.D.     | 0.005593 | N.D.     |
| Isobutyric acid<br>Butyric acid                                     | 0.105586 | 0.049927 | 0.064962 | 0.044534 | 0.113579 | 0.090151 |
| Isocitric acid                                                      | 0.000433 | N.D.     | N.D.     | N.D.     | N.D.     | N.D.     |
| Isoglutamic acid                                                    | 0.016566 | 0.010423 | 0.004554 | 0.001918 | 0.019063 | 0.014994 |
| Isopropanolamine                                                    | 0.001486 | 0.000193 | 0.002205 | 0.000765 | 0.001486 | 0.000477 |
| Isovaleric acid<br>Valeric acid                                     | 0.029833 | 0.010352 | 0.018039 | 0.002843 | 0.025816 | 0.011199 |
| Isovalerylalanine<br>N-Acetyl-leucine                               | 0.000214 | 5.13E-05 | 0.000159 | 1.3E-05  | 0.00019  | 4.64E-05 |
| Kojic acid                                                          | 0.001075 | 0.000215 | 0.001008 | 0.000262 | 0.001022 | 0.000124 |
| Kynurenic acid                                                      | 0.000109 | 2.1E-05  | 0.000114 | 3.39E-05 | 0.000141 | 9.53E-06 |
| Lactic acid                                                         | 0.195511 | 0.083869 | 0.153629 | 0.059531 | 0.111622 | 0.067228 |
| Lauric acid                                                         | 0.000195 | 9.84E-06 | 0.000152 | 2.99E-05 | 0.000151 | N.D.     |
| Leu                                                                 | 0.213415 | 0.040676 | 0.156594 | 0.061918 | 0.198728 | 0.064978 |
| Loperamide                                                          | N.D.     | N.D.     | N.D.     | N.D.     | 0.000326 | 4.54E-06 |
| Lys                                                                 | 0.209441 | 0.053193 | 0.132497 | 0.025826 | 0.226391 | 0.073281 |
| Malic acid                                                          | 0.063788 | 0.031826 | 0.055595 | 0.020562 | 0.066251 | 0.034661 |
| Melatonin                                                           | 0.001397 | 0.000107 | 0.001377 | 0.000279 | 0.001533 | 0.000107 |
| Met                                                                 | 0.072054 | 0.018464 | 0.046387 | 0.013598 | 0.070259 | 0.02717  |
| Methionine sulfoxide                                                | 0.006163 | 0.001484 | 0.004171 | 0.000474 | 0.006236 | 0.001709 |
| Mevalolactone                                                       | 0.002477 | N.D.     | 0.002103 | 0.00012  | N.D.     | N.D.     |
| Mevalonic acid                                                      | 0.000279 | 5E-05    | 0.00049  | 0.000195 | 0.000289 | 4.81E-05 |
| Mucic acid                                                          | 0.000218 | 7.87E-06 | 0.000282 | 3.01E-05 | 0.00019  | N.D.     |
| myo-Inositol 1-phosphate<br>myo-Inositol 3-phosphate                | 0.000556 | 0.000234 | 0.000319 | 0.000126 | 0.000413 | 9.3E-05  |
| myo-Inositol 2-phosphate                                            | 0.000354 | 5.89E-05 | 0.000699 | 0.000281 | 0.000395 | 0.000128 |
| N,N-Dimethylglycine                                                 | 0.002287 | 0.001859 | 0.002308 | 0.00207  | 0.002134 | 0.00101  |
| N,N-Dimethylhistidine                                               | 0.00028  | 1.47E-05 | 0.000297 | 0.000127 | 0.00033  | 6.54E-05 |
| N-Acetyl-β-alanine                                                  | 0.00064  | 0.00011  | 0.000603 | 0.000191 | 0.000422 | 0.000184 |
| N-Acetylalanine                                                     | 0.000257 | 7.75E-05 | 0.000201 | 5.51E-05 | 0.000204 | 5.37E-05 |
| N-Acetylaspargine                                                   | 0.00015  | 2.71E-05 | 0.000165 | 8.62E-05 | 0.000164 | 7.57E-05 |
| N-Acetylaspartic acid                                               | 0.000435 | 9.18E-05 | 0.000488 | 0.000184 | 0.00044  | 0.00023  |
| N-Acetylgalactosamine<br>N-Acetylmannosamine<br>N-Acetylglucosamine | 0.036627 | 0.009249 | 0.042755 | 0.014919 | 0.04456  | 0.018249 |
| N-Acetylglucosamine 1-phosphate                                     | 0.000114 | 1.32E-07 | 0.000175 | N.D.     | N.D.     | N.D.     |
| N-Acetylglucosamine 6-phosphate                                     | N.D.     | N.D.     | N.D.     | N.D.     | 6.41E-05 | N.D.     |
| N-Acetylglucosylamine                                               | N.D.     | N.D.     | 0.000376 | 6.77E-05 | 0.000433 | 0.000173 |

| Compound name                                                   | naive    |          | CSDS     |          | Crp4     |          |
|-----------------------------------------------------------------|----------|----------|----------|----------|----------|----------|
|                                                                 | Mean     | S.D.     | Mean     | S.D.     | Mean     | S.D.     |
| N-Acetylglutamic acid                                           | 0.003557 | 0.001297 | 0.001981 | 0.000789 | 0.00356  | 0.001163 |
| N-Acetylglutamine                                               | 0.000436 | 4.73E-05 | 0.000433 | 6.07E-05 | 0.000432 | 8.77E-05 |
| N-Acetyl glycine                                                | 0.000189 | 0.000151 | 0.000364 | 0.000315 | 0.000125 | N.D.     |
| N-Acetylhistidine                                               | 0.001543 | 0.000777 | 0.001162 | 0.00037  | 0.000861 | 0.000167 |
| N-Acetyllysine                                                  | 0.007959 | 0.001934 | 0.006389 | 0.000992 | 0.01063  | 0.004778 |
| N-Acetylmethionine                                              | 0.00044  | 0.000117 | 0.000333 | 9.34E-05 | 0.000368 | 0.000112 |
| N-Acetylmuramic acid                                            | 0.00355  | 0.001157 | 0.003086 | 0.001082 | 0.005008 | 0.001853 |
| N-Acetylneuraminic acid                                         | 0.019562 | 0.004925 | 0.022195 | 0.004558 | 0.017563 | 0.00176  |
| N-Acetylorithine                                                | 0.004638 | 0.001137 | 0.003273 | 0.00052  | 0.004652 | 0.001858 |
| N-Acetylputrescine                                              | 0.002605 | 0.001086 | 0.003179 | 0.001718 | 0.001485 | 0.000906 |
| N-Acetylserine                                                  | 0.001775 | 0.001107 | 0.003345 | 0.002088 | 0.001072 | 0.000339 |
| N-Acetyltryptophan                                              | 0.000442 | 1.52E-05 | 0.000432 | 7.46E-05 | 0.000482 | 5.03E-05 |
| N-Carbamoylaspartic acid                                        | 0.000174 | 6.5E-05  | 0.000237 | N.D.     | 0.000214 | 3.46E-06 |
| N-Formylmethionine                                              | 0.000202 | 2.44E-05 | 0.000207 | 2.55E-05 | 0.000185 | 2.54E-05 |
| N-Methylalanine                                                 | 0.005981 | 0.003004 | 0.002038 | 0.000966 | 0.006244 | 0.005136 |
| N-Methylglutamic acid                                           | 0.000708 | 0.000502 | 0.000321 | 6.93E-05 | 0.000594 | 0.00038  |
| N-Methylnorsalsolinol                                           | 0.000501 | 0.000103 | 0.000456 | 8.75E-05 | 0.000512 | 0.000167 |
| N-Methylproline                                                 | 0.005333 | 0.003299 | 0.003691 | 0.002838 | 0.002802 | 0.003034 |
| N <sup>2</sup> -Acetylaminoadipic acid                          | 0.000545 | 0.000251 | 0.000263 | 2.77E-05 | 0.000466 | 0.000184 |
| N <sup>2</sup> -Phenylacetylglutamine                           | 0.000686 | 0.00012  | 0.000646 | 0.000144 | 0.000769 | 8.72E-05 |
| N <sup>2</sup> -Succinylornithine                               | 0.000985 | 0.000546 | 0.001245 | 0.00043  | 0.001576 | 0.001286 |
| N <sup>5</sup> -Ethylglutamine                                  | 0.0023   | 0.001104 | 0.001233 | 0.000478 | 0.002178 | 0.001002 |
| N <sup>6</sup> ,N <sup>6</sup> ,N <sup>6</sup> -Trimethyllysine | 0.001008 | 0.000396 | 0.00058  | 0.000111 | 0.000821 | 0.000357 |
| N <sup>6</sup> -Acetyllysine                                    | 0.001799 | 0.000506 | 0.00094  | 0.000167 | 0.001796 | 0.0006   |
| N <sup>6</sup> -Methyladenine                                   | 0.000416 | 9.4E-05  | 0.000369 | 9.02E-05 | 0.000431 | 0.000143 |
| N <sup>6</sup> -Methyllysine                                    | 0.000935 | 0.000319 | 0.00066  | 0.000151 | 0.000911 | 0.000346 |
| N <sup>8</sup> -Acetylspermidine                                | 0.001291 | 0.000648 | 0.000777 | 0.000353 | 0.001257 | 0.000528 |
| Nicotinic acid                                                  | 0.074068 | 0.024796 | 0.042703 | 0.013337 | 0.075163 | 0.027114 |
| N <sub>ω</sub> -Methylarginine                                  | 0.00013  | N.D.     | N.D.     | N.D.     | N.D.     | N.D.     |
| O-Acetylhomoserine                                              | 0.000886 | 0.000189 | 0.000987 | 0.000259 | 0.000807 | 6.9E-05  |
| 2-Aminoadipic acid                                              | 0.000596 | 0.000265 | 0.00066  | 0.000506 | 0.000465 | 0.000187 |
| O-Acetylserine                                                  | 0.000217 | 4.94E-05 | 0.000284 | 0.000105 | 0.000146 | 2.35E-05 |
| o-Coumaric acid                                                 | 0.000217 | 4.94E-05 | 0.000284 | 0.000105 | 0.000146 | 2.35E-05 |
| p-Coumaric acid                                                 | 0.000217 | 4.94E-05 | 0.000284 | 0.000105 | 0.000146 | 2.35E-05 |
| o-Hydroxybenzoic acid                                           | 0.000249 | 9.28E-05 | 0.000309 | 0.000216 | 0.000192 | 4.32E-05 |
| Octanoic acid                                                   | 0.000209 | N.D.     | N.D.     | N.D.     | 0.000338 | N.D.     |
| Ornithine                                                       | 0.082143 | 0.019759 | 0.057638 | 0.021198 | 0.079585 | 0.034459 |
| Orotic acid                                                     | N.D.     | N.D.     | N.D.     | N.D.     | 0.001144 | 0.000187 |
| Oxypurinol                                                      | N.D.     | N.D.     | N.D.     | N.D.     | 0.003444 | N.D.     |
| p-Aminobenzoic acid                                             | 0.001149 | 0.00035  | 0.000647 | 0.000196 | 0.001146 | 0.000596 |
| p-Aminophenol                                                   | N.D.     | N.D.     | 0.000345 | 7.56E-05 | 0.000249 | N.D.     |
| m-Aminophenol                                                   | N.D.     | N.D.     | 0.000345 | 7.56E-05 | 0.000249 | N.D.     |
| p-Hydroxybenzoic acid                                           | 0.000256 | 5.99E-05 | 0.000528 | 0.000448 | N.D.     | N.D.     |
| p-Hydroxymandelic acid                                          | 0.000368 | 7.24E-05 | 0.000325 | 7.4E-05  | 0.000305 | 5.49E-05 |
| p-Hydroxyphenylacetic acid                                      | 0.008522 | 0.003999 | 0.006748 | 0.003459 | 0.005116 | 0.002353 |
| p-Hydroxyphenylpyruvic acid                                     | 0.000859 | 0.000188 | 0.00058  | 0.000128 | 0.000651 | 0.00025  |
| p-Toluic acid                                                   | 0.001382 | 0.00034  | 0.001051 | 0.000532 | 0.001224 | 0.000274 |
| m-Toluic acid                                                   | 0.001382 | 0.00034  | 0.001051 | 0.000532 | 0.001224 | 0.000274 |
| o-Toluic acid                                                   | 0.001382 | 0.00034  | 0.001051 | 0.000532 | 0.001224 | 0.000274 |
| Pantothenic acid                                                | 0.010582 | 0.003282 | 0.00746  | 0.0025   | 0.01344  | 0.004075 |
| Penicillamine                                                   | 0.000829 | 0.000175 | 0.000564 | 6.46E-05 | 0.000812 | 0.000152 |
| Phe                                                             | 0.108583 | 0.021767 | 0.082683 | 0.0395   | 0.1009   | 0.035863 |
| Phenylpyruvic acid                                              | 0.001124 | 0.000489 | 0.000575 | 0.000141 | 0.000928 | 0.000392 |
| Phosphorylcholine                                               | 0.000613 | 0.000446 | 0.0009   | 0.000266 | N.D.     | N.D.     |
| Phthalic acid                                                   | 0.000243 | 4.23E-05 | 0.000258 | 5.51E-05 | 0.000252 | 3.44E-05 |
| Picolinic acid                                                  | 0.000372 | 7.68E-05 | 0.000267 | N.D.     | N.D.     | N.D.     |
| Pimelic acid                                                    | 0.000367 | 6.01E-05 | 0.000332 | 8.91E-05 | 0.000347 | 0.000106 |

| Compound name                     | naive    |          | CSDS     |          | Crp4     |          |
|-----------------------------------|----------|----------|----------|----------|----------|----------|
|                                   | Mean     | S.D.     | Mean     | S.D.     | Mean     | S.D.     |
| Pipecolic acid                    | 0.00492  | 0.001541 | 0.004539 | 0.001558 | 0.003969 | 0.001398 |
| Piperidine                        | 0.000912 | 0.000359 | 0.000783 | 0.00019  | 0.000733 | 0.000267 |
| Pro                               | 0.134677 | 0.018226 | 0.121447 | 0.023889 | 0.117042 | 0.027328 |
| Propionic acid                    | 0.071227 | 0.020905 | 0.04873  | 0.016245 | 0.045379 | 0.009561 |
| Prostaglandin E <sub>2</sub>      | 0.003168 | 0.000407 | 0.003026 | 0.000603 | 0.003444 | 0.000164 |
| Purine                            | 0.000418 | 8.24E-05 | N.D.     | N.D.     | 0.000413 | 0.000102 |
| Putrescine                        | 0.005162 | 0.001861 | 0.008505 | 0.004716 | 0.005416 | 0.002695 |
| Pyridoxal                         | 0.002003 | 0.000145 | 0.001602 | 0.000336 | 0.001731 | 0.000195 |
| Pyridoxamine                      | 0.00161  | 0.000636 | 0.000862 | 0.0005   | 0.002271 | 0.00066  |
| Pyridoxamine 5'-phosphate         | 0.000531 | 0.00029  | 0.000268 | 5.39E-06 | 0.000703 | 0.000488 |
| Pyridoxine                        | 0.001876 | 0.001199 | 0.002139 | 0.000934 | 0.001117 | 0.00041  |
| Pyrophosphate                     | 0.012274 | 0.001499 | 0.009672 | 0.001973 | 0.012245 | 0.002482 |
| Pyruvic acid                      | 0.003029 | 0.000861 | 0.003779 | 0.001547 | 0.003196 | 0.000814 |
| Quinic acid                       | 0.001182 | 0.000118 | 0.001181 | 0.000234 | 0.001265 | 0.000158 |
| Quinolinic acid                   | 0.00041  | 0.000136 | 0.000361 | 9.51E-05 | 0.000498 | 0.000175 |
| Riboflavin                        | 0.0009   | 8.24E-05 | 0.000738 | 0.000165 | 0.001052 | 0.000265 |
| Ribose 5-phosphate                | 0.00079  | 0.000561 | 0.000471 | 0.000378 | 0.000744 | 0.000647 |
| Ribulose 5-phosphate              | 0.002644 | 0.001373 | 0.002505 | 0.001651 | 0.004632 | 0.003063 |
| S-Adenosylmethionine              | 0.000573 | N.D.     | 0.000372 | 0.000233 | 0.001918 | 0.001415 |
| S-Sulfocysteine                   | 0.000234 | 6.19E-05 | 0.000376 | 0.000172 | 0.000239 | 6.57E-05 |
| Saccharopine                      | 0.000847 | 0.000251 | 0.000654 | 0.000115 | 0.000927 | 0.000258 |
| Sarcosine                         | 0.007153 | 0.002514 | 0.008578 | 0.007167 | 0.005303 | 0.001168 |
| SDMA                              | 0.000655 | 0.000128 | 0.000529 | 0.000148 | 0.000549 | 0.000143 |
| Sebacic acid                      | 0.001223 | 0.000244 | 0.001    | 0.000288 | 0.000941 | 0.000407 |
| Sedoheptulose 7-phosphate         | 0.001796 | 0.001594 | 0.000545 | 0.00038  | 0.001159 | 0.001578 |
| Ser                               | 0.059905 | 0.007109 | 0.053825 | 0.016166 | 0.053348 | 0.011878 |
| Ser-Glu                           | 0.001668 | 0.000287 | 0.001351 | 0.000336 | 0.001853 | 0.000891 |
| Serotonin                         | 0.000323 | 9.14E-05 | 0.000401 | 0.000122 | 0.000437 | 8.22E-05 |
| Sinapic acid                      | 0.0008   | 0.000113 | 0.000905 | 0.000181 | 0.000816 | 9.01E-05 |
| Spermidine                        | 0.020068 | 0.009368 | 0.011338 | 0.007048 | 0.024574 | 0.010878 |
| Stachydrine                       | 0.00055  | 0.000166 | 0.000711 | 0.000326 | 0.00044  | 0.00014  |
| Suberic acid                      | 0.001265 | 0.000177 | 0.001201 | 0.000328 | 0.00121  | 0.000344 |
| Succinic acid                     | 0.110001 | 0.064798 | 0.062137 | 0.036094 | 0.0913   | 0.043954 |
| Syringic acid                     | 0.000217 | 6.23E-05 | 0.000276 | 5.48E-05 | 0.00021  | 5.86E-05 |
| Taurine                           | 0.04152  | 0.050556 | 0.047825 | 0.049037 | 0.037053 | 0.025805 |
| Taurocholic acid                  | 0.001032 | 0.00088  | 0.002503 | 0.002473 | 0.0007   | 0.000218 |
| Terephthalic acid                 | 0.000707 | 0.00011  | 0.000755 | 3.64E-05 | 0.000734 | 4.62E-05 |
| Thiamine                          | 0.001734 | 0.000342 | 0.000996 | 0.000423 | 0.001912 | 0.000822 |
| Thiamine diphosphate              | 0.000194 | 0.000103 | 0.000108 | N.D.     | 0.000237 | 9.81E-05 |
| Thiamine phosphate                | 0.000604 | 0.00013  | 0.000451 | 0.000153 | 0.000707 | 0.000205 |
| Thr                               | 0.089341 | 0.020491 | 0.061793 | 0.015146 | 0.088605 | 0.026827 |
| Thr-Asp                           | 0.000938 | 0.000118 | 0.000806 | 0.000207 | 0.001001 | 0.000433 |
| threo-β-Methylaspartic acid       | 0.000735 | 0.000225 | 0.000457 | 4.33E-05 | 0.00072  | 0.000265 |
| Threonic acid                     | N.D.     | N.D.     | 0.00063  | 7.93E-05 | 0.000687 | 0.000268 |
| Thymidine                         | 0.002798 | 0.000324 | 0.002798 | 0.000668 | 0.003666 | 0.001029 |
| Thymine                           | 0.014199 | 0.003962 | 0.014153 | 0.00665  | 0.017247 | 0.006135 |
| trans-Glutaconic acid             | 0.005726 | 0.002964 | 0.001807 | 0.00075  | 0.004943 | 0.003579 |
| Trehalose 6-phosphate             | 0.000196 | 8.02E-06 | N.D.     | N.D.     | 0.000147 | N.D.     |
| Trigonelline                      | N.D.     | N.D.     | 0.000771 | N.D.     | N.D.     | N.D.     |
| Trimethylamine                    | 0.035522 | 0.011909 | 0.022105 | 0.006717 | 0.033877 | 0.008928 |
| Trimethylamine N-oxide            | 0.000442 | 7.48E-05 | 0.000274 | 4.33E-05 | 0.000282 | 5.28E-05 |
| Tropic acid                       |          |          |          |          |          |          |
| 3-Phenyllactic acid               |          |          |          |          |          |          |
| 3-(2-Hydroxyphenyl)propionic acid | 0.00156  | 0.000797 | 0.000908 | 0.000171 | 0.001056 | 0.000625 |
| m-Ethoxybenzoic acid              |          |          |          |          |          |          |
| p-Methoxyphenylacetic acid        |          |          |          |          |          |          |
| Atrolactic acid                   |          |          |          |          |          |          |

| Compound name                     | naive    |          | CSDS     |          | Crp4     |          |
|-----------------------------------|----------|----------|----------|----------|----------|----------|
|                                   | Mean     | S.D.     | Mean     | S.D.     | Mean     | S.D.     |
| Trp                               | 0.01009  | 0.00071  | 0.012529 | 0.011027 | 0.0091   | 0.00296  |
| Tryptamine                        | N.D.     | N.D.     | N.D.     | N.D.     | 0.000183 | 1.09E-05 |
| Tyr                               | 0.058287 | 0.01331  | 0.041661 | 0.020115 | 0.057451 | 0.023289 |
| Tyr-Glu                           | 0.000351 | 2.94E-05 | 0.000317 | 6.85E-05 | 0.000382 | 0.000101 |
| Tyramine                          | 0.000356 | 9.39E-05 | 0.000385 | 0.000104 | 0.000591 | 0.000251 |
| UMP                               | 0.000213 | N.D.     | 0.000126 | N.D.     | 0.000153 | N.D.     |
| Undecanoic acid                   | 0.000138 | 1.6E-05  | 0.000125 | 3.13E-05 | 0.000162 | 2.35E-05 |
| Uracil                            | 0.034032 | 0.008771 | 0.019551 | 0.006578 | 0.035936 | 0.010285 |
| Uridine                           | 0.007276 | 0.002367 | 0.004355 | 0.001334 | 0.008383 | 0.00421  |
| Urocanic acid                     | 0.00431  | 0.000463 | 0.003566 | 0.000476 | 0.00565  | 0.002149 |
| Val                               | 0.174883 | 0.038409 | 0.127777 | 0.05845  | 0.155071 | 0.047241 |
| Xanthine                          | 0.067344 | 0.021117 | 0.035805 | 0.01071  | 0.061896 | 0.020195 |
| Xanthosine                        | 0.000593 | 0.000248 | 0.000292 | 0.000185 | 0.000947 | 0.001211 |
| Xanthurenic acid                  | N.D.     | N.D.     | 0.000129 | N.D.     | 0.000225 | N.D.     |
| $\beta$ -Ala                      | 0.012548 | 0.0033   | 0.00758  | 0.00194  | 0.016364 | 0.008494 |
| $\beta$ -Ala-Lys                  | 0.000344 | 0.00019  | 0.000287 | 0.000115 | 0.000676 | 0.000673 |
| $\beta$ -Tyr                      | 0.000232 | N.D.     | 0.000185 | 6.56E-05 | 0.000189 | N.D.     |
| $\gamma$ -Butyrobetaine           | 0.015485 | 0.006745 | 0.008516 | 0.001836 | 0.015222 | 0.008677 |
| $\gamma$ -Glu-2-aminobutyric acid | 0.000791 | 0.00033  | 0.000578 | 0.000141 | 0.000843 | 0.000264 |
| $\gamma$ -Glu-Val-Gly             | 0.001324 | 0.000331 | 0.001407 | 0.000273 | 0.001539 | 0.000538 |

N.D.: not detected.

For peaks that were not identified as a single metabolite, multiple candidates are described.
